# Supplementary material for: Development of robust noble-metal free lanthanum, neodymium doped Li1.05Ni0.5Mn1.5O4 as a bifunctional electrocatalyst for electrochemical water splitting
Source: Royal Society of Chemistry journal article supplement (doi:10.1039/d3ra04495e), 2023-01-01
Supplement: d3ra04495e1.pdf [file d3ra04495e1.pdf]

## Supporting Information

### **Development of robust noble-metal free Lanthanum, Neodymium Doped $\text{Li}_{1.05}\text{Ni}_{0.5}\text{Mn}_{1.5}\text{O}_4$ as a bifunctional electrocatalyst for electrochemical water splitting**

Kayalvizhi Rajagopal<sup>1</sup>, Murugavel Kathiresan<sup>2</sup>, Arulmozhi Rajaram<sup>1</sup>, Abirami Natarajan<sup>1\*</sup>,  
Kumaresan Natesan<sup>3</sup>

<sup>1</sup>*Department of Chemistry, Faculty of Engineering and Technology, SRM Institute of Science and  
Technology, Kattankulathur, Tamil Nadu-603 203, India.*

<sup>2</sup> *Electro Organic & Materials Electrochemistry Division, CSIR – Central Electrochemical  
Research Institute, Karaikudi, Tamil Nadu – 630003, INDIA.*

<sup>3</sup>*Department of Physics, SSN Research Centre, Sri Sivasubramaniya Nadar College of  
Engineering, Chennai, 603110, Tamil Nadu, India*

\*Corresponding author: Dr. N. Abirami

Mail Id: abiramin@srmist.edu.in

## 1. Synthesis method

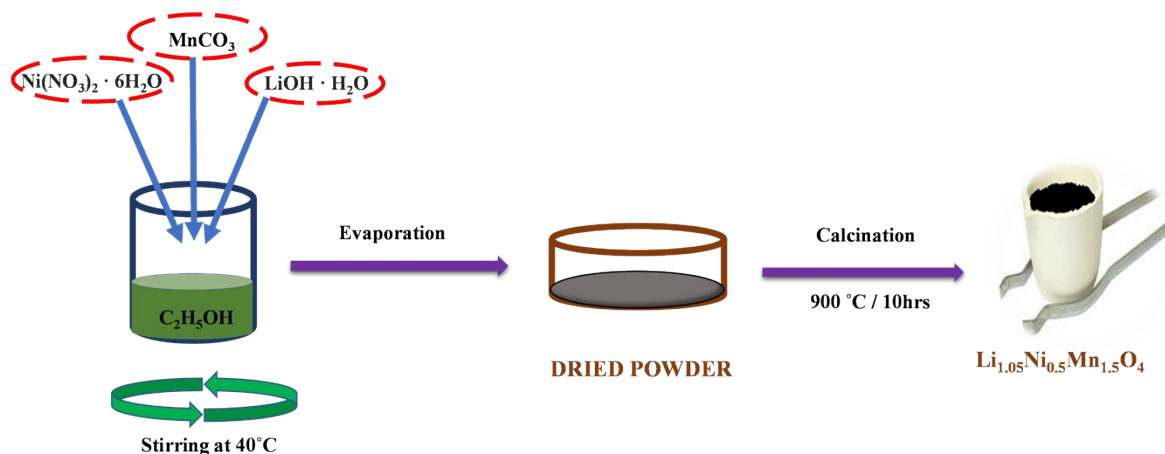

### 1.1 Preparation of $Li_{1.05}Ni_{0.5}Mn_{1.5}O_4$

**Figure. S1** Schematic represents the preparation of  $Li_{1.05}Ni_{0.5}Mn_{1.5}O_4$

To synthesize  $Li_{1.05}Ni_{0.5}Mn_{1.5}O_4$ , stoichiometric quantities of (1.05) lithium hydroxide monohydrate, (0.5) nickel nitrate hexahydrate, and (1.5) manganese carbonate in the proportions 1.05:0.5:1.5 of Li, Ni, and Mn were dissolved in ethanol. The ethanol was evaporated at  $40^\circ C$  while stirring. After vaporization, the mixture was thermally treated at  $900^\circ C$  for 10 h at a rate of  $0.8^\circ C \text{ min}^{-1}$  to achieve the final product presented in Figure S1.

## 1.2 Preparation of $\text{Li}_{1.05}\text{Ni}_{0.5}\text{La}_{0.10}\text{Mn}_{1.40}\text{O}_4$

**Figure. S2** Schematic represents the preparation of  $\text{Li}_{1.05}\text{Ni}_{0.5}\text{La}_{0.10}\text{Mn}_{1.40}\text{O}_4$

(1.05) Lithium hydroxide monohydrate, (0.5) nickel nitrate hexahydrate, (0.10) lanthanum oxide, and (1.40) manganese carbonate were dissolved in ethanol in the proportions 1.05:0.5:1.40 and 0.10 of Li, Ni, La, and Mn. To combine the reactants, the dispersion was mixed, and while stirring, the ethanol evaporated at 40°C. After volatilization, the mixture was calcined at 900 °C

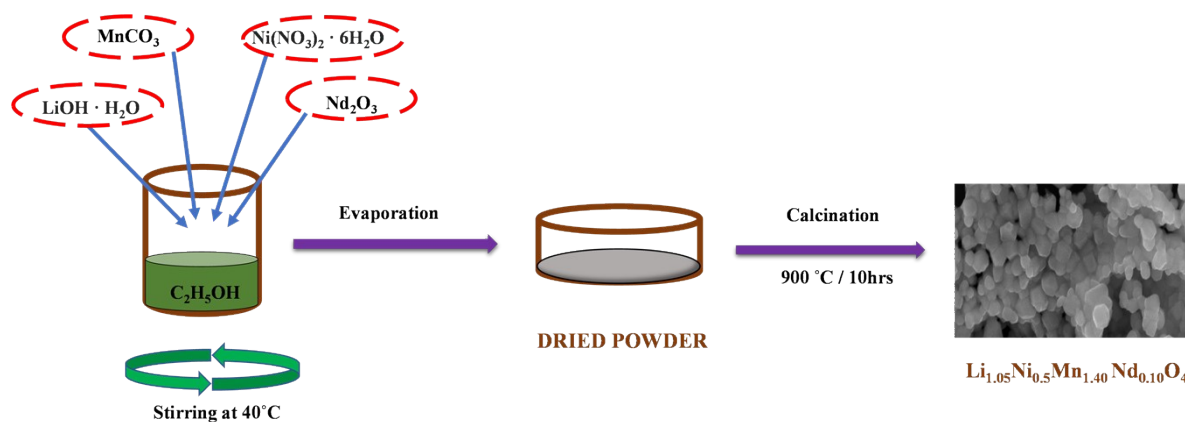

for 10 hours at a rate of 0.8 °C  $\text{min}^{-1}$  to yield  $\text{Li}_{1.05}\text{Ni}_{0.5}\text{La}_{0.10}\text{Mn}_{1.40}\text{O}_4$  is presented in Figure S2.

## 1.3 Preparation of $\text{Li}_{1.05}\text{Ni}_{0.5}\text{Nd}_{0.10}\text{Mn}_{1.40}\text{O}_4$

**Figure S3** Schematic represents the preparation of  $\text{Li}_{1.05}\text{Ni}_{0.5}\text{Nd}_{0.10}\text{Mn}_{1.40}\text{O}_4$

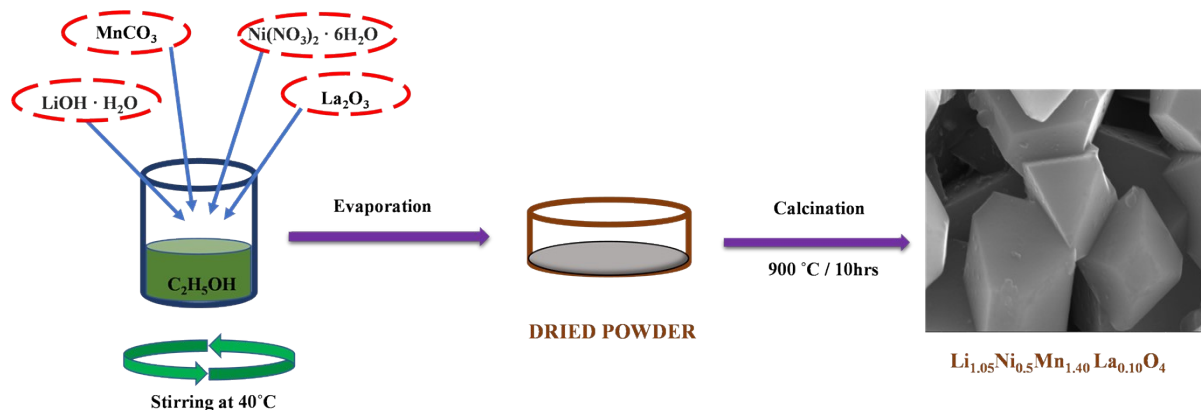

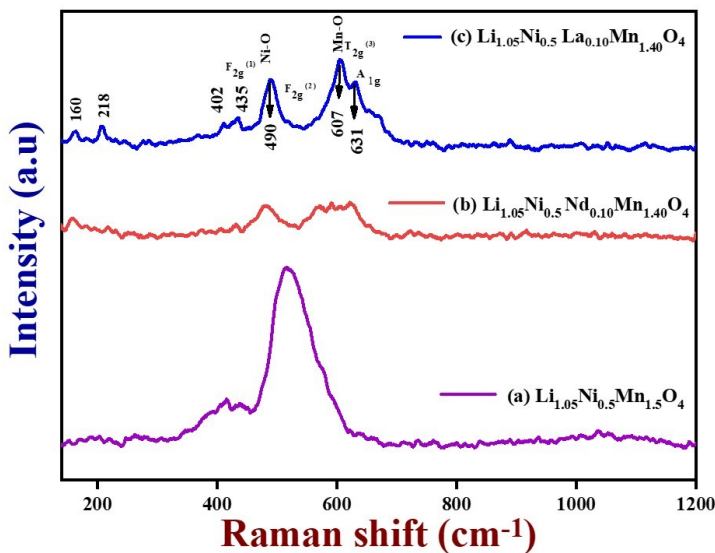

Stoichiometric quantities of (1.05) lithium hydroxide monohydrate, (0.5) nickel nitrate hexahydrate, (0.10) neodymium (III)oxide, and (1.40) manganese carbonate were dissolved in ethanol

in the ratios 1.05:0.5:1.40 and 0.10 of Li, Ni, Nd, and Mn. To mix the reactants, the dispersion was stirred, and the ethanol evaporated at 40 °C while stirring the mixture. Following evaporation, the

°C for

min<sup>-1</sup>

in

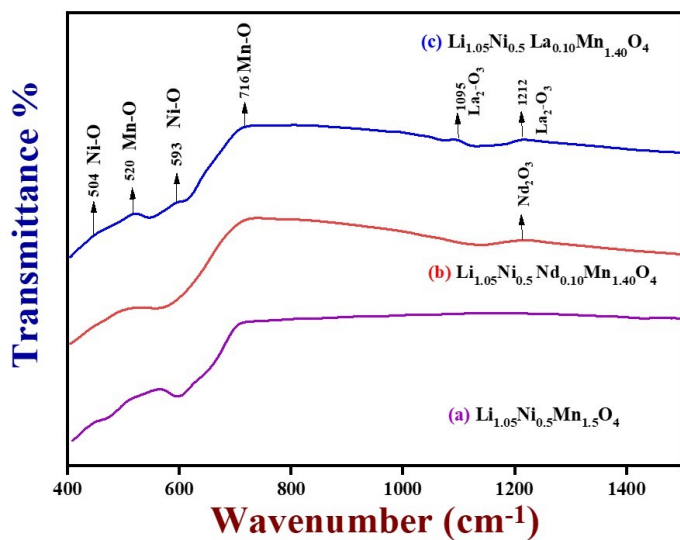

mixture was calcined at 900

10 hours at a rate of 0.8 °C

to obtain Li<sub>1.05</sub>Ni<sub>0.5</sub>

Nd<sub>0.10</sub>Mn<sub>1.40</sub>O<sub>4</sub> is presented

Figure S3.

**Figure S4** Raman spectra of (a) Li<sub>1.05</sub>Ni<sub>0.5</sub>Mn<sub>1.5</sub>O<sub>4</sub>, (b) Li<sub>1.05</sub>Ni<sub>0.5</sub> Nd<sub>0.10</sub>Mn<sub>1.40</sub>O<sub>4</sub> and (c) Li<sub>1.05</sub>Ni<sub>0.5</sub> La<sub>0.10</sub>Mn<sub>1.40</sub>O<sub>4</sub>

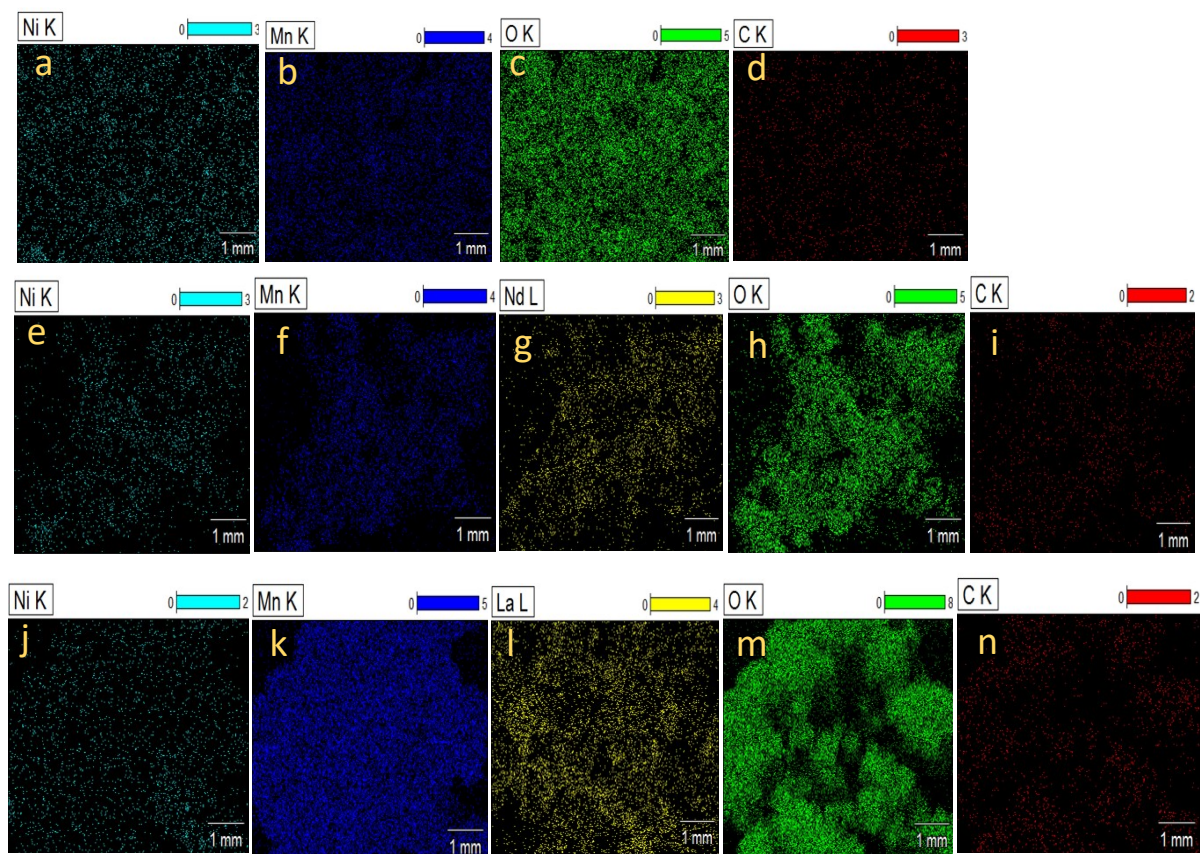

**Figure S5** FT- IR spectra of (a)  $\text{Li}_{1.05}\text{Ni}_{0.5}\text{Mn}_{1.5}\text{O}_4$ , (b)  $\text{Li}_{1.05}\text{Ni}_{0.5}\text{Nd}_{0.10}\text{Mn}_{1.40}\text{O}_4$  and (c)  $\text{Li}_{1.05}\text{Ni}_{0.5}\text{La}_{0.10}\text{Mn}_{1.40}\text{O}_4$ .

**Figure S6** Elemental mapping images of (a-d)  $\text{Li}_{1.05}\text{Ni}_{0.5}\text{Mn}_{1.5}\text{O}_4$ , (e-i)  $\text{Li}_{1.05}\text{Ni}_{0.5}\text{Nd}_{0.10}\text{Mn}_{1.40}\text{O}_4$  and (j-n)  $\text{Li}_{1.05}\text{Ni}_{0.5}\text{La}_{0.10}\text{Mn}_{1.40}\text{O}_4$

**Figure S7** EDAX images of (a)  $\text{Li}_{1.05}\text{Ni}_{0.5}\text{Mn}_{1.5}\text{O}_4$ , (b)  $\text{Li}_{1.05}\text{Ni}_{0.5}\text{Nd}_{0.10}\text{Mn}_{1.40}\text{O}_4$  and (c)  $\text{Li}_{1.05}\text{Ni}_{0.5}\text{La}_{0.10}\text{Mn}_{1.40}\text{O}_4$

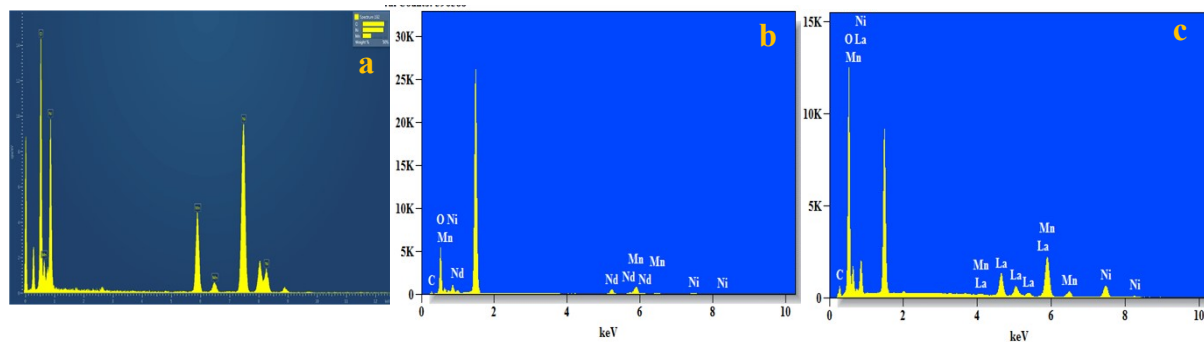

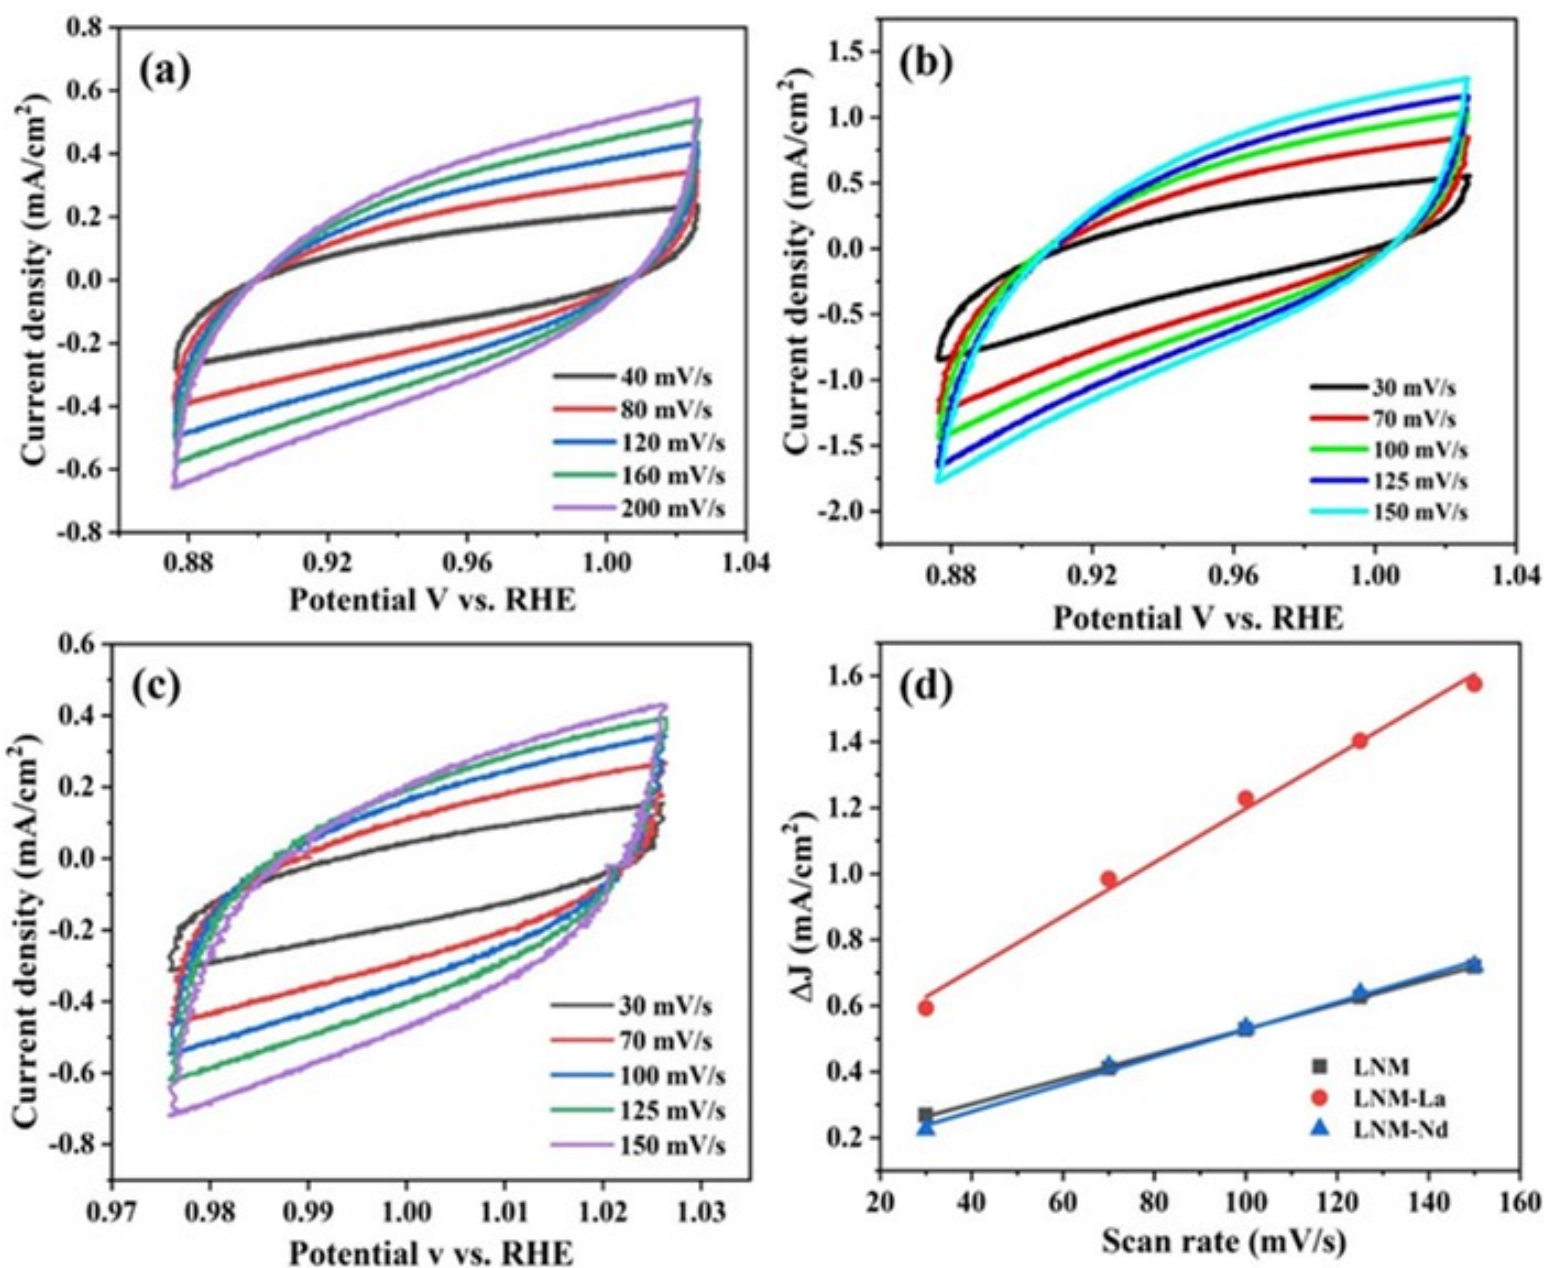

Figure S8 HER analysis: (a-c) Cyclic voltametric analysis of at different scan rates of LNM, LNM-La, and LNM-Nd; (d) Plot of different scan rate vs. current density for LNM, LNM-La and LNM-Nd

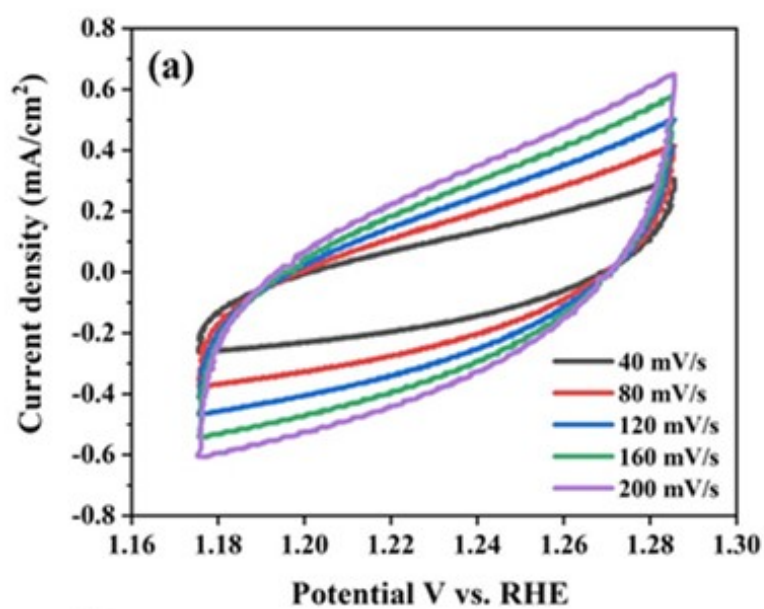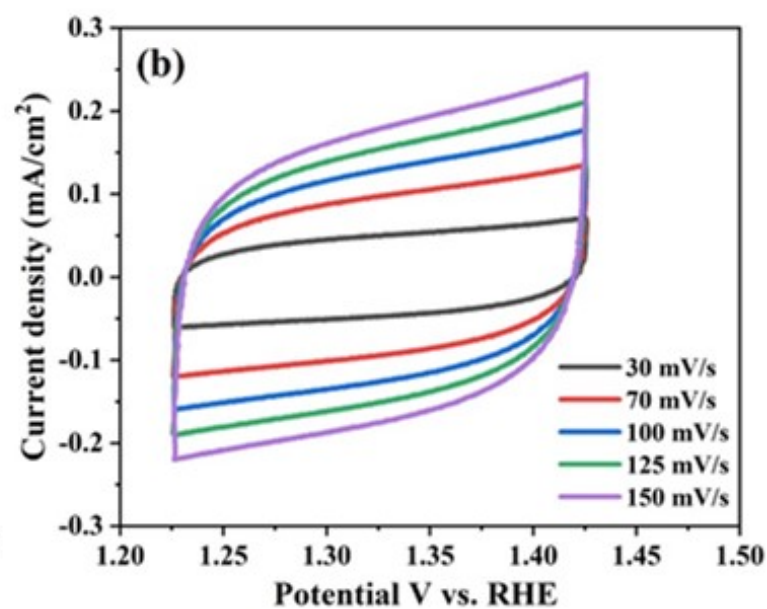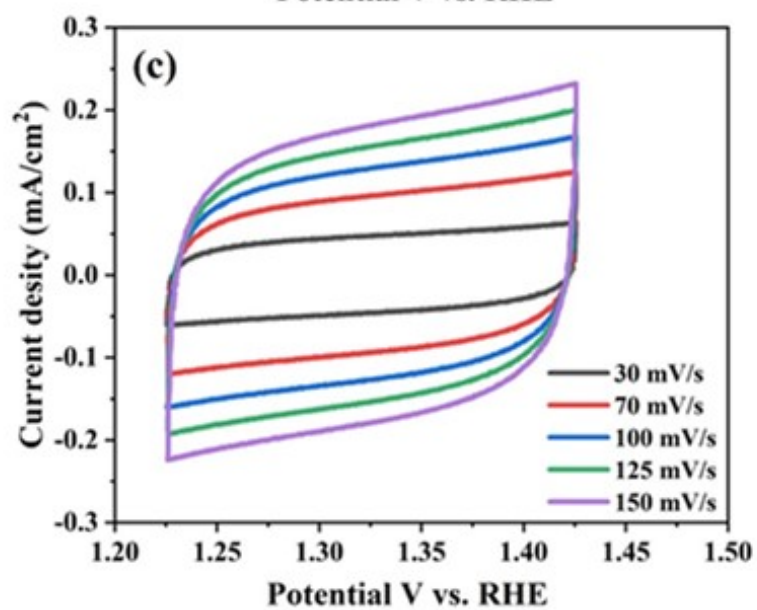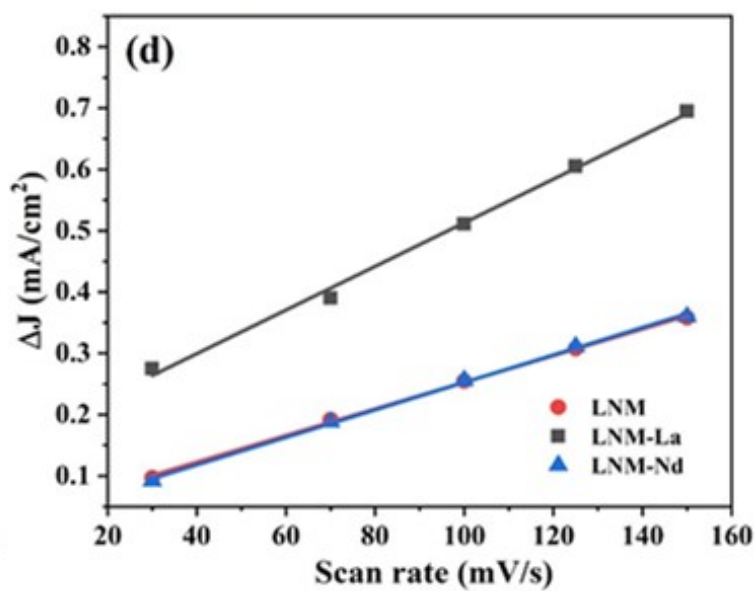



Figure S9 OER analysis: (S9a-S9c) Cyclic voltameter analysis of LNM, LNM-La and LNM-Nd at different scan rates; (d) Plot of different scan rate vs. current density for LNM, LNM-La and

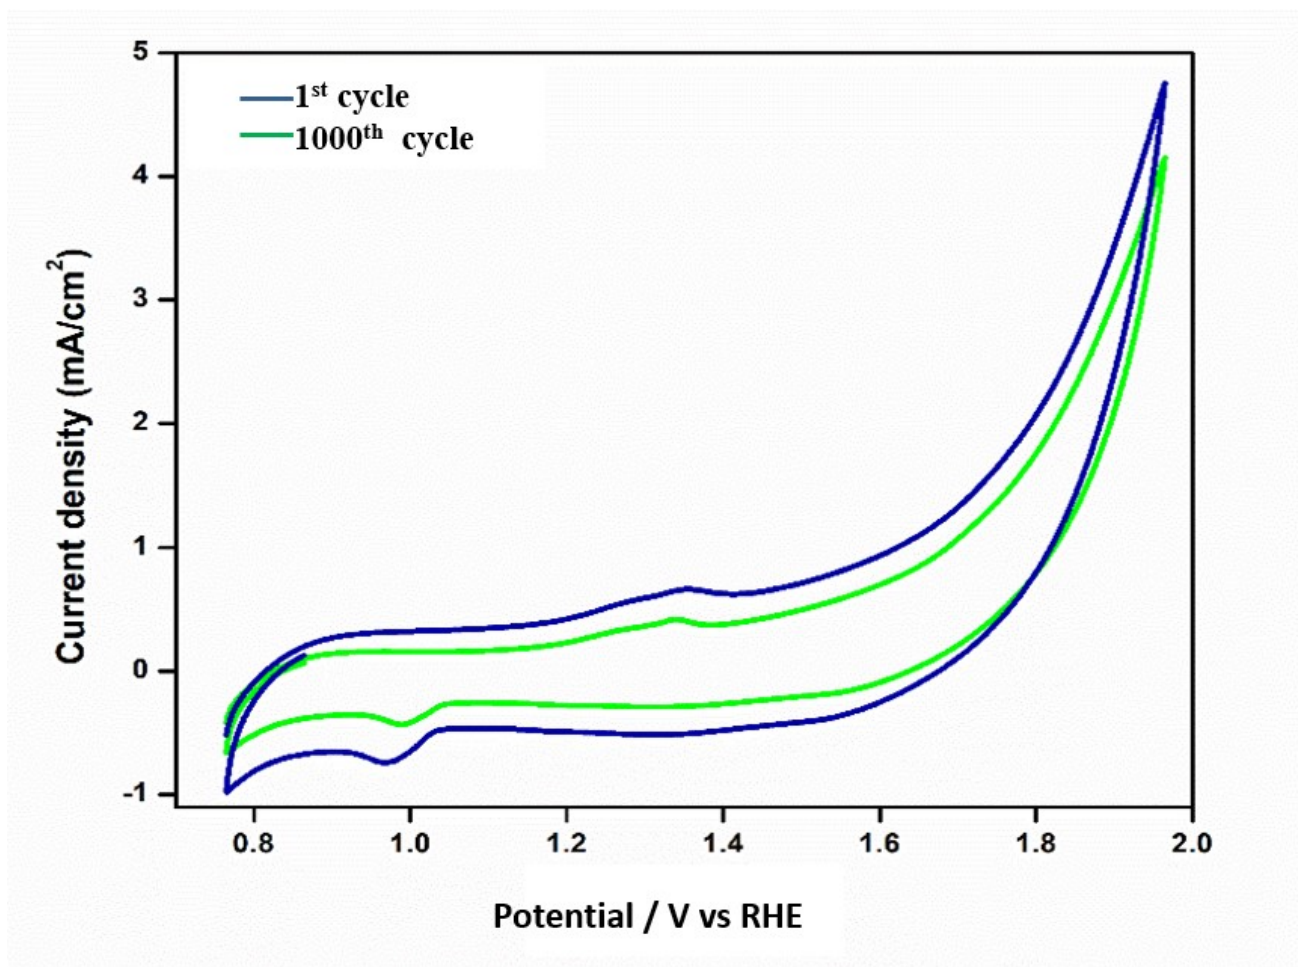

LNM-Nd

Figure S10 CV cycle stability test: Cyclic voltammograms measured at 1000 cycles at a scan rate of 50 mV/s were used to assess the stability of the  $\text{Li}_{1.05}\text{Ni}_{0.5}\text{La}_{0.10}\text{Mn}_{1.40}\text{O}_4$  catalyst.

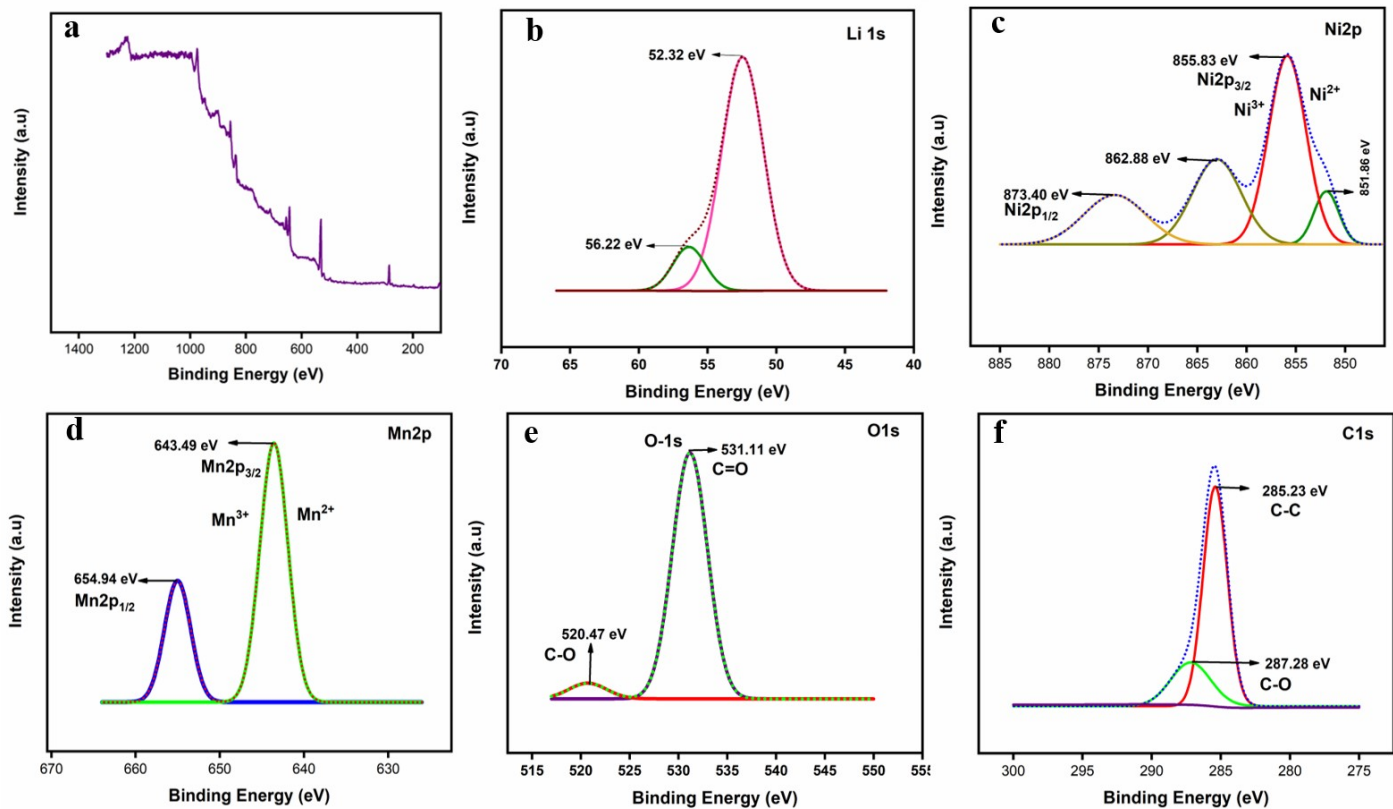

Figure S11 XPS spectra (a) XPS full survey spectra of  $\text{Li}_{1.05}\text{Ni}_{0.5}\text{Mn}_{1.5}\text{O}_4$ , (b) Li 1s, (c) Ni 2p, (d) Mn2p, (e) O1s, (f) C1s

Figure S12 XPS spectra (a) XPS full survey spectra of  $\text{Li}_{1.05}\text{Ni}_{0.5}\text{Nd}_{0.10}\text{Mn}_{1.40}\text{O}_4$ , (b) Li 1s, (c) Ni 2p, (d) Mn2p, (e) Nd 3d, (f) O1s, (g) C

**Table S1 Comparison Table of the performance of LNM with recently reported catalysts.**

| S.No | Catalyst      | Overpotential (mv) |     | Tafel slope ( $\text{mV dec}^{-1}$ ) |           | Electrolyte | Reference |
|------|---------------|--------------------|-----|--------------------------------------|-----------|-------------|-----------|
|      |               | OER                | HER | OER                                  | HER       |             |           |
| 1    | NiMn-LDH      | 296                | 120 | 102                                  | 79        | 1M KOH      | 32        |
| 2    | LSTN@NiMn-LDH | 387                | 125 | 103                                  | 84        | 1M KOH      | 33        |
| 4    | L             | e                  | f   | g                                    | This work | This work   | This work |
| 5    |               |                    |     |                                      |           |             |           |
| 6    | LNM-La        | 1.68               | 118 | -0.41                                | 73        | 1M KOH      | This work |
